# Supplementary material for: 1,2-13C2-Glucose Tracing Approach to Assess Metabolic Alterations of Human Monocytes under Neuroinflammatory Conditions
Source: MDPI journal article supplement (doi:10.3390/cimb45010051), 2023-01-16
Supplement: s1 [file s1]

## Supplementary materials

**Table S1.** Concentrations of the targeted analytes in cell lysate and culture medium. The reported concentrations are mean ( $\pm$  SD) values of three biological replicates.

|                                             | Cell lysate                    |                  |                  |                  | Incubation medium              |                  |                  |                  |
|---------------------------------------------|--------------------------------|------------------|------------------|------------------|--------------------------------|------------------|------------------|------------------|
|                                             | NS                             | CON              | AD               | MScI             | NS                             | CON              | AD               | MScI             |
|                                             | $\mu\text{g/mL} \pm \text{SD}$ |                  |                  |                  | $\mu\text{g/mL} \pm \text{SD}$ |                  |                  |                  |
| Pyruvate                                    | 1.30 $\pm$ 0.60                | 2.48 $\pm$ 0.09  | 2.35 $\pm$ 0.44  | 1.87 $\pm$ 0.45  | 3.49 $\pm$ 0.12                | 8.21 $\pm$ 0.65  | 8.38 $\pm$ 0.70  | 7.39 $\pm$ 0.98  |
| 2,3- <sup>13</sup> C <sub>2</sub> pyruvate  | 0.55 $\pm$ 0.19                | 0.78 $\pm$ 0.08  | 0.710 $\pm$ 0.14 | 0.623 $\pm$ 0.19 | 1.43 $\pm$ 0.09                | 2.25 $\pm$ 0.13  | 2.32 $\pm$ 0.05  | 2.16 $\pm$ 0.19  |
| Lactate                                     | 41.20 $\pm$ 8.32               | 43.79 $\pm$ 2.57 | 40.40 $\pm$ 6.05 | 35.48 $\pm$ 7.35 | 48.00 $\pm$ 3.04               | 41.65 $\pm$ 0.95 | 51.36 $\pm$ 4.63 | 54.12 $\pm$ 4.23 |
| 1,2- <sup>13</sup> C <sub>2</sub> lactate   | 7.26 $\pm$ 1.16                | 8.04 $\pm$ 0.84  | 6.76 $\pm$ 1.02  | 6.80 $\pm$ 1.26  | 8.09 $\pm$ 0.96                | 7.36 $\pm$ 0.85  | 7.82 $\pm$ 0.59  | 9.53 $\pm$ 0.56  |
| 2- <sup>13</sup> C glycine                  | n.q.                           | n.q.             | n.q.             | n.q.             | 0.15*                          | n.q.             | n.q.             | n.q.             |
| Glycine                                     | 6.68 $\pm$ 1.63                | 4.73 $\pm$ 0.45  | 3.96 $\pm$ 0.55  | 3.93 $\pm$ 0.82  | 12.22 $\pm$ 0.14               | 8.75 $\pm$ 0.35  | 8.22 $\pm$ 0.19  | 8.96 $\pm$ 0.49  |
| 1,2- <sup>13</sup> C <sub>2</sub> glutamine | n.q.                           | 0.05 $\pm$ 0.01  | 0.04 $\pm$ 0.01  | 0.031*           | n.q.                           | 0.09 $\pm$ 0.01  | 0.09 $\pm$ 0.004 | 0.06 $\pm$ 0.01  |
| Glutamine                                   | 1.27 $\pm$ 0.35                | 6.40 $\pm$ 0.94  | 5.56 $\pm$ 0.98  | 3.71 $\pm$ 1.02  | 2.24 $\pm$ 0.07                | 12.35 $\pm$ 1.04 | 12.39 $\pm$ 0.64 | 9.24 $\pm$ 1.04  |
| Serine                                      | 12.51 $\pm$ 3.80               | 8.30 $\pm$ 0.82  | 6.97 $\pm$ 0.96  | 6.91 $\pm$ 1.82  | 25.24 $\pm$ 0.20               | 17.41 $\pm$ 0.39 | 15.65 $\pm$ 0.09 | 16.95 $\pm$ 0.19 |
| Glutamic acid                               | 7.67 $\pm$ 2.94                | 8.44 $\pm$ 0.98  | 6.81 $\pm$ 1.05  | 7.43 $\pm$ 1.32  | 17.12 $\pm$ 0.51               | 16.32 $\pm$ 0.62 | 13.77 $\pm$ 0.79 | 12.83 $\pm$ 0.25 |
| Citric acid                                 | 2.99 $\pm$ 2.51                | 10.81 $\pm$ 1.24 | 10.58 $\pm$ 2.76 | 7.78 $\pm$ 1.59  | 11.90 $\pm$ 1.87               | 40.90 $\pm$ 1.44 | 41.27 $\pm$ 1.91 | 34.12 $\pm$ 4.58 |

\* Only one sample over the three biological replicates presented the analyte; n.q. denotes “not quantifiable”.
